# Supplementary material for: Variability in the properties of the distribution of the relative humidity with respect to ice: implications for contrail formation
Source: Copernicus journal article supplement (doi:10.5194/acp-24-5495-2024), 2024-05-14
Supplement: Supplementary file 1 [file acp-24-5495-2024-supplement.pdf]

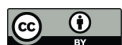

*Supplement of*

## **Variability in the properties of the distribution of the relative humidity with respect to ice: implications for contrail formation**

**Sidiki Sanogo et al.**

*Correspondence to:* Sidiki Sanogo (sidiki.sanogo@ipsl.fr, sanogo.abs@gmail.com)

The copyright of individual parts of the supplement might differ from the article licence.

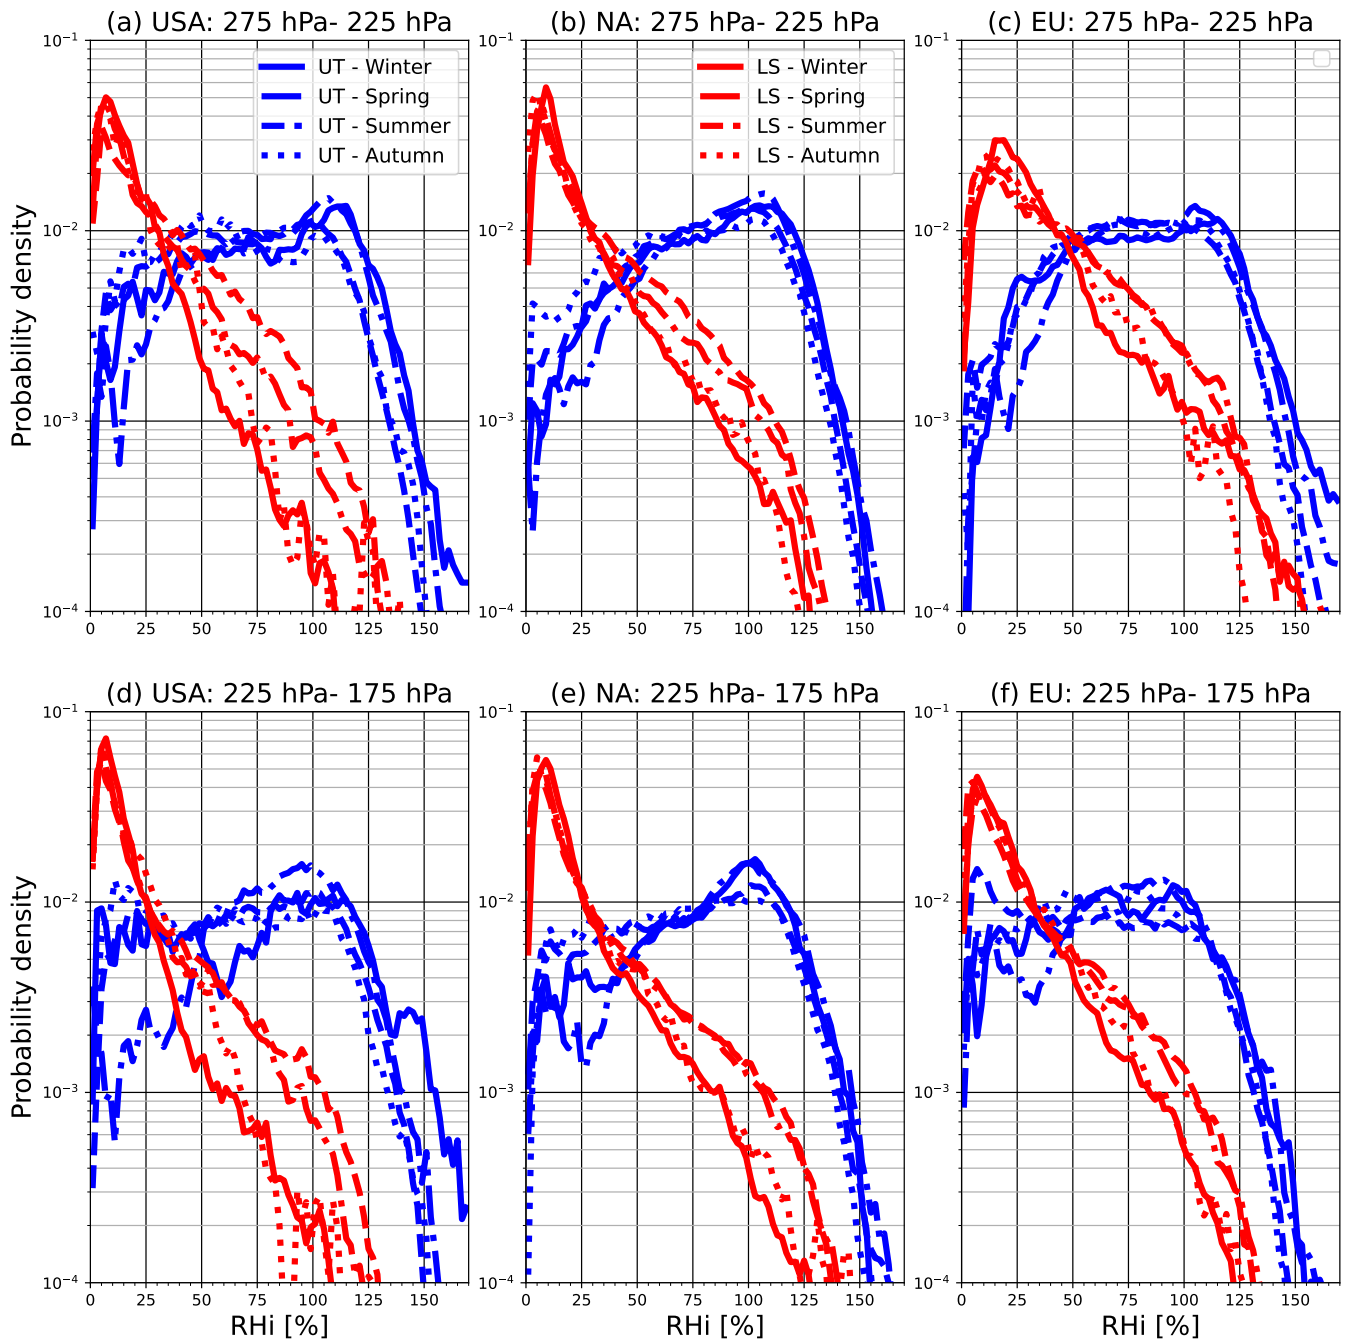

**Figure S1.** Same as Fig. 4 but for each season, for the pressure layers 275-225 and 225-175 hPa.

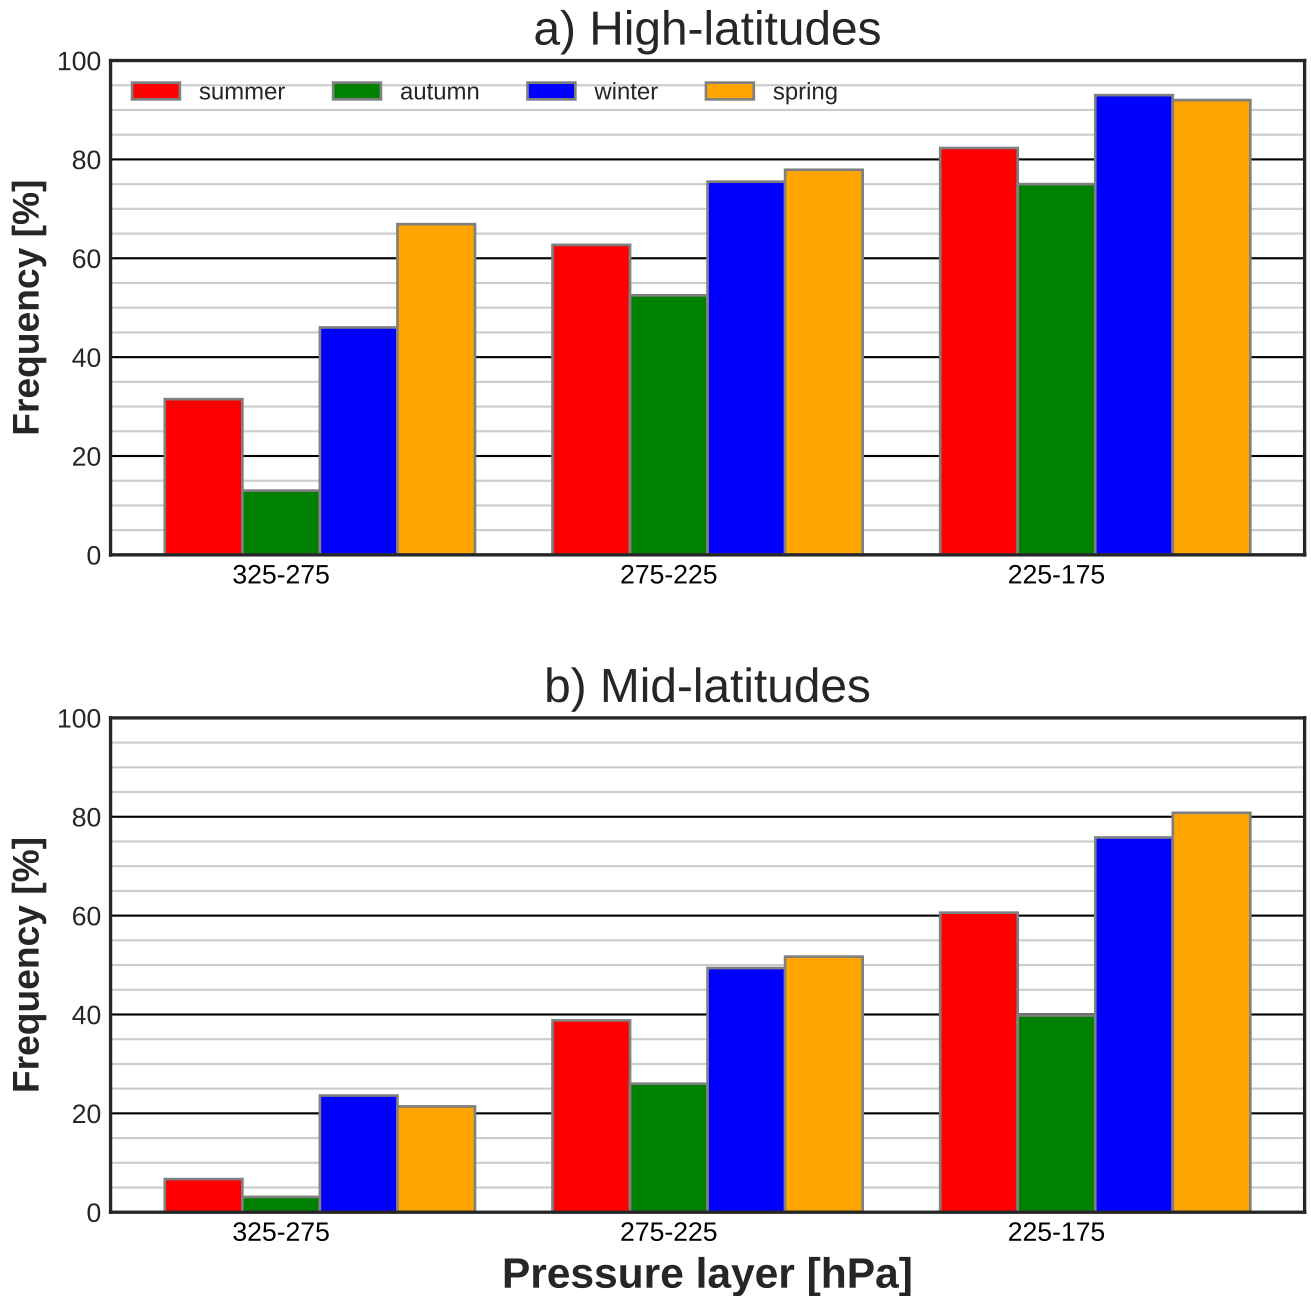

**Figure S2.** Same as Fig. 7 but for the percentage of measurements made in the LS in a) the high-latitudes and b) the mid-latitudes.

**Table S1.** Difference between the frequency of ice supersaturation and the frequency of persistent contrail formation associated with kerosene, bio-ethanol and liquid-hydrogen as a fuel in the high-latitude regions, computed over the period 1995-2022 for each season and three pressure layers.

| Regions       | Summer   |         |          | Autumn   |         |          | Winter   |         |          | Spring   |         |          |
|---------------|----------|---------|----------|----------|---------|----------|----------|---------|----------|----------|---------|----------|
| Fuels         | Kerosene | Ethanol | Hydrogen |
| 325 - 275 hPa | 11.4 %   | 4.8 %   | 0.3 %    | 2.1 %    | 0.7 %   | 0.0 %    | 0.0 %    | 0.0 %   | 0.0 %    | 0.0 %    | 0.0 %   | 0.0 %    |
| 275 - 225 hPa | 0.5 %    | 0.0 %   | 0.0 %    | 0.2 %    | 0.0 %   | 0.0 %    | 0.0 %    | 0.0 %   | 0.0 %    | 0.0 %    | 0.0 %   | 0.0 %    |
| 225 - 175 hPa | 0.0 %    | 0.0 %   | 0.0 %    | 0.0 %    | 0.0 %   | 0.0 %    | 0.0 %    | 0.0 %   | 0.0 %    | 0.0 %    | 0.0 %   | 0.0 %    |

**Table S2.** Same as Table S1 but for the mid-latitude regions.

| Regions       | Summer   |         |          | Autumn   |         |          | Winter   |         |          | Spring   |         |          |
|---------------|----------|---------|----------|----------|---------|----------|----------|---------|----------|----------|---------|----------|
| Fuels         | Kerosene | Ethanol | Hydrogen |
| 325 - 275 hPa | 16.0 %   | 10.0 %  | 2.9 %    | 11.1 %   | 5.4 %   | 0.9 %    | 2.5 %    | 0.4 %   | 0.0 %    | 4.9 %    | 1.3 %   | 0.1 %    |
| 275 - 225 hPa | 3.6 %    | 0.6 %   | 0.0 %    | 1.9 %    | 0.4 %   | 0.0 %    | 0.0 %    | 0.0 %   | 0.0 %    | 0.2 %    | 0.0 %   | 0.0 %    |
| 225 - 175 hPa | 0.2 %    | 0.1 %   | 0.0 %    | 0.0 %    | 0.0 %   | 0.0 %    | 0.0 %    | 0.0 %   | 0.0 %    | 0.0 %    | 0.0 %   | 0.0 %    |

**Table S3.** Same as Table S1 but for the tropics.

| Regions       | Summer   |         |          | Autumn   |         |          | Winter   |         |          | Spring   |         |          |
|---------------|----------|---------|----------|----------|---------|----------|----------|---------|----------|----------|---------|----------|
| Fuels         | Kerosene | Ethanol | Hydrogen |
| 325 - 275 hPa | 9.4 %    | 9.4 %   | 9.1 %    | 9.9 %    | 9.3 %   | 5.5 %    | 5.5 %    | 5.5 %   | 4.5 %    | 7.42 %   | 7.3 %   | 5.9 %    |
| 275 - 225 hPa | 9.6 %    | 6.7 %   | 1.9 %    | 5.9 %    | 9.8 %   | 9.8 %    | 9.8 %    | 5.6 %   | 1.3 %    | 10.5 %   | 7.3 %   | 0.6 %    |
| 225 - 175 hPa | 5.2 %    | 1.4 %   | 0.0 %    | 0.3 %    | 0.2 %   | 0.2 %    | 2.1 %    | 0.0 %   | 0.0 %    | 3.6 %    | 0.1 %   | 0.0 %    |
